# Supplementary material for: Automatically Quantifying Spatial Heterogeneity of Immune and Tumor Hypoxia Environment and Predicting Disease Free Survival for Patients with Rectal Cancer
Source: Research Square preprint supplement (doi:10.21203/rs.3.rs-7568529/v1), 2025-09-23
Supplement: Supplementary file 1 [file 782af4c5af28ed234d5f6231.docx]

**1. Training configurations and parameters**

The training hyper-parameters were set as follows: Training spanned 800 epochs and each epoch contained 2000 tiles that cropped form the training set, with a batch size of 16. The learning rate was set as 0.0000, and every 200 epochs, the learning rate decreased by 10% from its previous value. Second-order norm regularization coefficient was set at 1% of the current learning rate. Optimization was performed using the Adam optimizer with default parameters. The loss function was set as binary cross entropy.

**2. Digital image analysis protocols and cells counting**

For the binary mask of DAB staining, we manually adjusted the threshold to exclude staining artifacts caused by incomplete washout, with the threshold set at 0.02. We then further filtered noise using the median blur algorithm (kernel size = 5) with OpenCV, and the mask at this threshold was visually verified by an oncologist with five years of experience. For cell counting, we utilized OpenCV's contouring function to delineate the DAB-stained areas. However, in practice, stained cells often appear in very close proximity to one another, leading to connectivity in the binary mask, which prevents direct counting of regions based on the topological features of the binary mask. We manually performed cell area measurements on 100 stained cells in QuPath, yielding an average area of 32 square μm, or 512 pixels. Regions greater than 800 pixels in area were considered to contain clustered cells, and the number of cells was estimated by dividing the area by the average cell size.

**3. Results of univariable Cox regression for significant (p<0.05) CD3/CD8 cells counting features in the cluster 5**

**Table S1**

| **features** | **log(HR)** | **C-index** | **p** |
| --- | --- | --- | --- |
| IS_cells counting_outer_tumor+invasive_margin_0.25 | -217.039 | 0.624 | 0.33 |
| IS_cells counting_outer_tumor+invasive_margin_0.5 | -244.962 | 0.631 | 0.27 |
| IS_cells counting_outer_tumor+invasive_margin_0.75 | -257.753 | 0.633 | 0.25 |
| IS_cells counting_outer_tumor+invasive_margin_1.0 | -336.89 | 0.640 | 0.18 |
| IS_cells counting_outer_tumor+invasive_margin_1.25 | -325.469 | 0.638 | 0.19 |
| IS_cells counting_outer_tumor+invasive_margin_1.5 | -321.456 | 0.638 | 0.19 |

**4. Results of univariable Cox regression for significant (p<0.05) HIF1-α relevant features**

**Table S2**

| **features** | **log(HR)** | **C-index** | **p** |
| --- | --- | --- | --- |
| HIF_areas_invasive_margin_0.5 | 0.309518 | 0.659 | 0.027 |
| HIF_areas_invasive_margin_1.0 | 0.309045 | 0.661 | 0.036 |
| HIF_areas_invasive_margin_1.0 | 1.053101 | 0.709 | 0.036 |
| HIF_areas_invasive_margin_1.5 | 0.312194 | 0.684 | 0.040 |
| HIF_areas_invasive_margin_1.5 | 1.053101 | 0.709 | 0.036 |
| HIF_areas_invasive_margin_2.0 | 0.302959 | 0.675 | 0.049 |
| HIF_areas_invasive_margin_2.0 | 1.053363 | 0.711 | 0.035 |
| HIF_areas_outer_invasive_margin_0.25 | 0.32023 | 0.682 | 0.018 |
| HIF_areas_outer_invasive_margin_0.5 | 0.314793 | 0.679 | 0.024 |
| HIF_areas_outer_invasive_margin_0.75 | 1.096908 | 0.714 | 0.026 |
| HIF_areas_outer_invasive_margin_1.0 | 0.306411 | 0.700 | 0.034 |
| HIF_areas_outer_invasive_margin_1.25 | 0.305246 | 0.698 | 0.037 |
| HIF_areas_outer_invasive_margin_1.5 | 0.306899 | 0.691 | 0.038 |
| HIF_cells counting_invasive_margin_0.5 | 147.7225 | 0.632 | 0.040 |
| HIF_cells counting_invasive_margin_1.5 | 1.055804 | 0.7125 | 0.033 |
| HIF_cells counting_outer_invasive_margin_0.25 | 151.5213 | 0.648 | 0.028 |
| HIF_cells counting_outer_invasive_margin_0.5 | 148.3194 | 0.650 | 0.035 |
| HIF_cells counting_outer_invasive_margin_0.75 | 147.5102 | 0.675 | 0.038 |
| HIF_cells counting_outer_invasive_margin_1.0 | 141.3964 | 0.677 | 0.049 |
|  |  |  |  |

**5. Results of univariable Cox regression for significant (p<0.05) CD3 and CD8 relevant features**

**Table S3 Results of univariable Cox regression for significant (p<0.05) CD3 relevant features**

| **features** | **log(HR)** | **C-index** | **p** |
| --- | --- | --- | --- |
| CD3_staining depth_inner_invasive_margin_0.75 | -37.7276 | 0.716763 | 0.047644 |
| CD3_staining depth_invasive_margin_0.5 | -25.0104 | 0.720617 | 0.047307 |
| CD3_staining depth_invasive_margin_1.0 | -28.1449 | 0.728324 | 0.049059 |
| CD3_staining depth_outer_invasive_margin_0.25 | -23.3375 | 0.739884 | 0.038311 |
| CD3_staining depth_outer_invasive_margin_0.5 | -24.9894 | 0.745665 | 0.038436 |
| CD3_staining depth_outer_invasive_margin_0.75 | -25.8094 | 0.732177 | 0.046635 |
| CD3_staining depth_outer_tumor+invasive_margin_0.25 | -23.3374 | 0.739884 | 0.038311 |
| CD3_staining depth_outer_tumor+invasive_margin_0.5 | -24.9897 | 0.745665 | 0.038436 |
| CD3_staining depth_outer_tumor+invasive_margin_0.75 | -25.8094 | 0.732177 | 0.046634 |
| CD3_areas_inner_invasive_margin_0.25 | -1.60464 | 0.701349 | 0.044018 |
| CD3_areas_inner_invasive_margin_0.5 | -1.83563 | 0.697495 | 0.04662 |
| CD3_areas_invasive_margin_0.5 | -1.41922 | 0.707129 | 0.038277 |
| CD3_areas_invasive_margin_1.0 | -1.55864 | 0.716763 | 0.040472 |
| CD3_areas_invasive_margin_1.5 | -1.62993 | 0.699422 | 0.047352 |
| CD3_areas_outer_invasive_margin_0.25 | -1.33413 | 0.716783 | 0.027745 |
| CD3_areas_outer_invasive_margin_0.5 | -1.41628 | 0.715035 | 0.029197 |
| CD3_areas_outer_invasive_margin_0.75 | -1.47169 | 0.715035 | 0.036034 |
|  |  |  |  |

**Table S4 Results of univariable Cox regression for significant (p<0.05) CD8 relevant features**

| **features** | **log(HR)** | **C-index** | **p** |
| --- | --- | --- | --- |
| CD8_staining depth_inner_invasive_margin_0.25 | -15.0113 | 0.69685 | 0.041626 |
| CD8_staining depth_invasive_margin_0.5 | -13.4242 | 0.692913 | 0.03886 |
| CD8_staining depth_outer_invasive_margin_0.25 | -11.8308 | 0.673228 | 0.044423 |
|  |  |  |  |

**5. The forest plot of multi-variable Cox regression model of CD3_staining depth_outer_tumor+invasive_margin_0.5 and CD8_staining depth_invasive_margin_0.5**

**
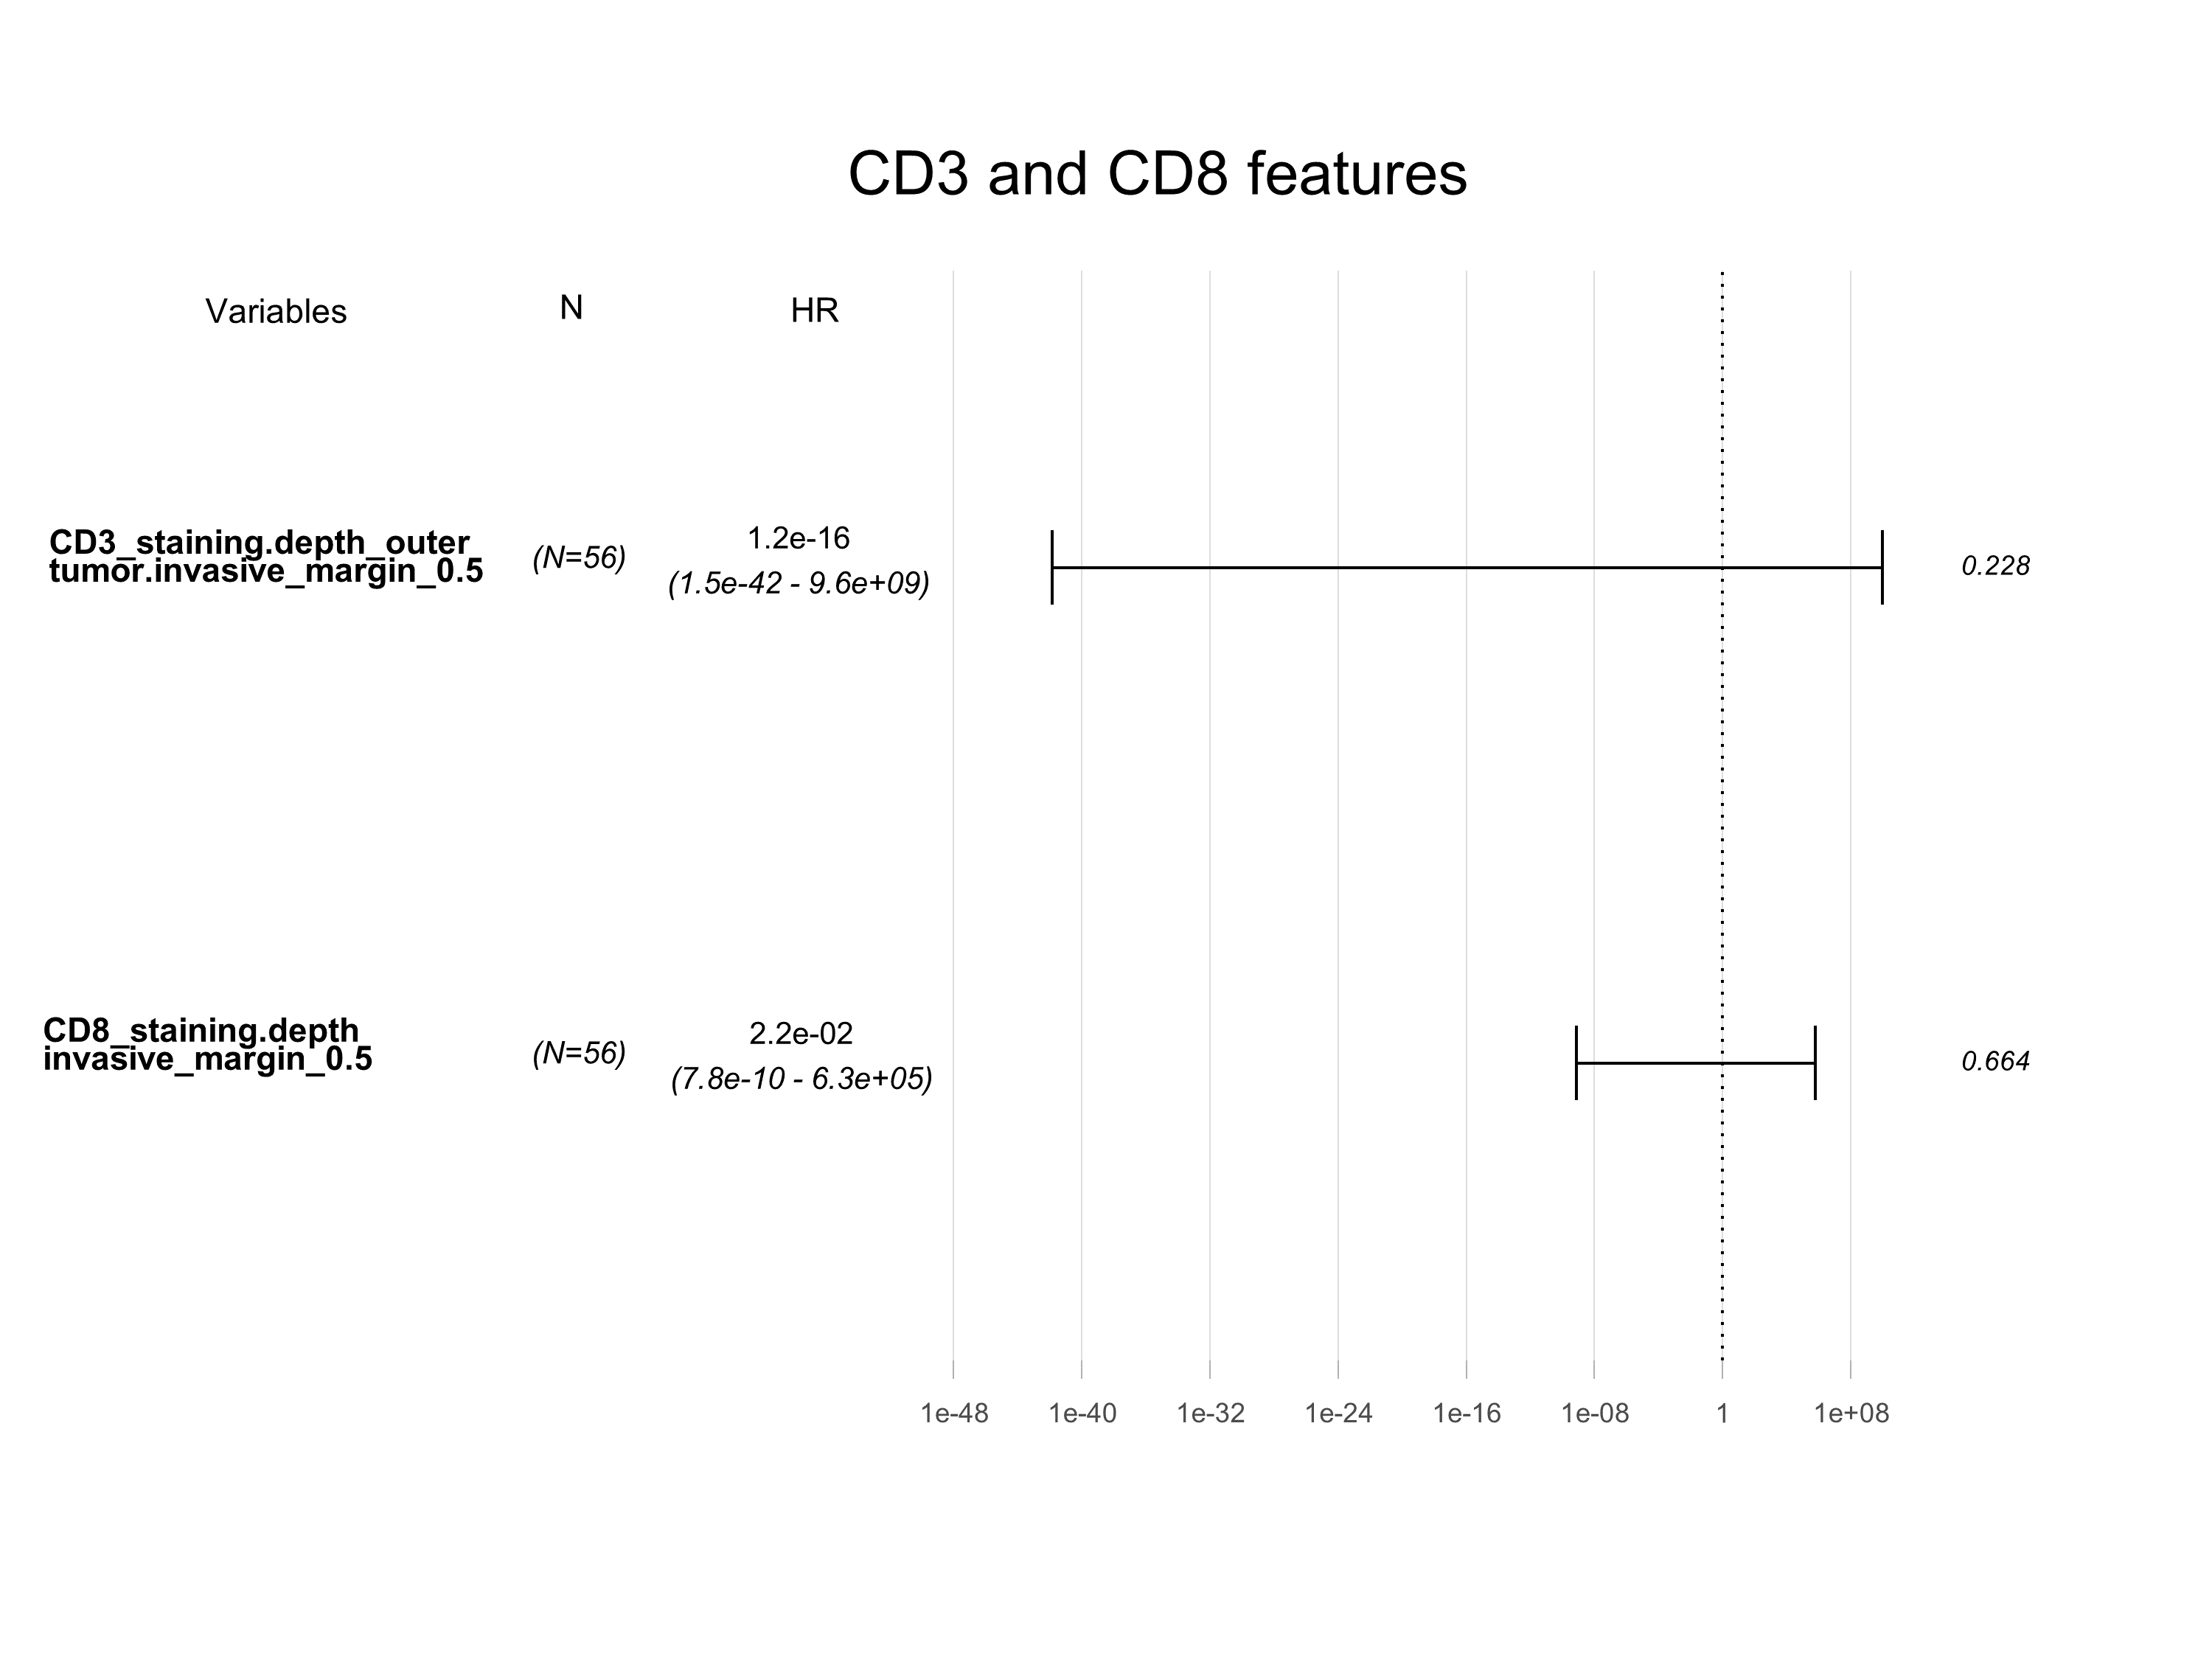
**
